# Supplementary material for: Global Analysis of Posttranscriptional Gene Expression in Response to Sodium Arsenite
Source: PubMed Central journal article supplement (PMC4383576; doi:10.1289/ehp.1408626), 2014-11-21
Supplement: ehp.1408626.s001.508.pdf [file ehp.1408626.s001.508.pdf]

**Supplemental Material**

**Global Analysis of Posttranscriptional Gene Expression in Response  
to Sodium Arsenite**

Lian-Qun Qiu, Sarah Abey, Shawn Harris, Ruchir Shah, Kevin E. Gerrish, and Perry J.

Blackshear

**Figure S1.**

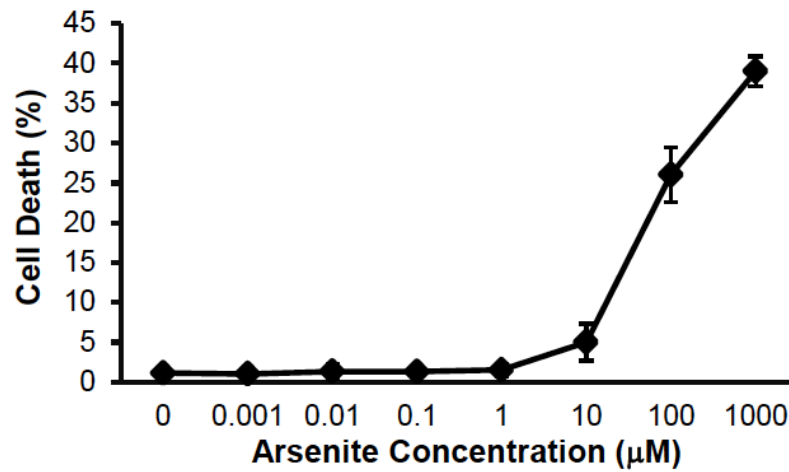

**Figure S1.** Cytotoxicity assay of sodium arsenite in human foreskin fibroblasts. Rates of cell death were determined using propidium iodide staining followed by flow cytometric analysis after 24 h of treatment of human BJ fibroblasts with sodium arsenite at the concentrations indicated. Results shown are the means  $\pm$  SD from 2-5 experiments.

Figure S2.

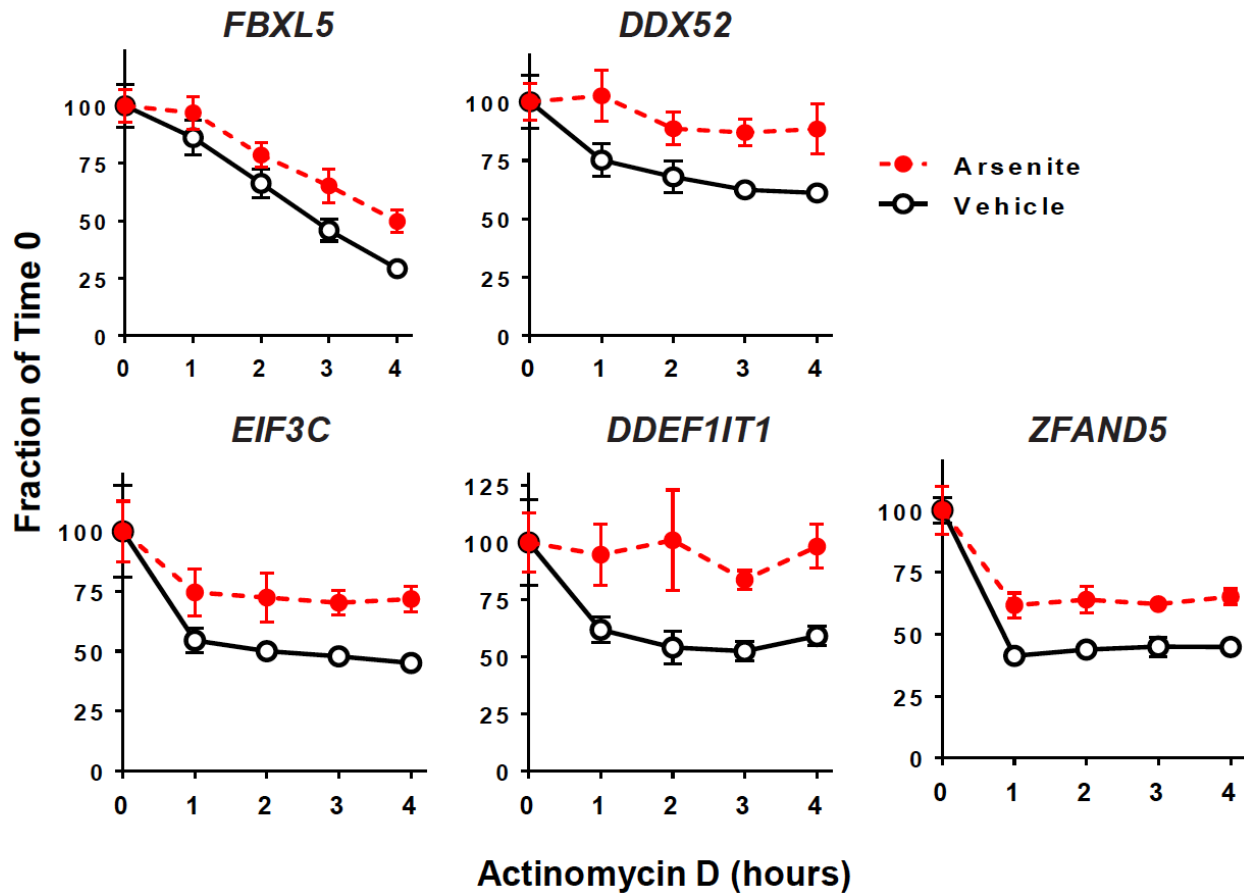

**Figure S2.** Decay rates of probe set-identified transcripts measured by microarray whose steady state levels after arsenite were not significantly different from control, but whose decay rates were significantly decreased by arsenite. Shown are the decay rates for five transcripts whose steady state levels were not significantly different in the control and arsenite-treated cells, but whose decay rates were significantly different by both the Oriegen and Edge methods ( $P < 0.05$ ). In these five examples, arsenite stabilized the mRNA. The Affymetrix probe set identifiers used for these transcripts were: FBXL5, 209004\_s\_at; DDX52, 1570415\_at; EIF3C, 236700\_at; DDEF1IT1, 217649\_at; ZFAND5, 220694\_at. See the legend to Figure 1 for details.

Figure S3.

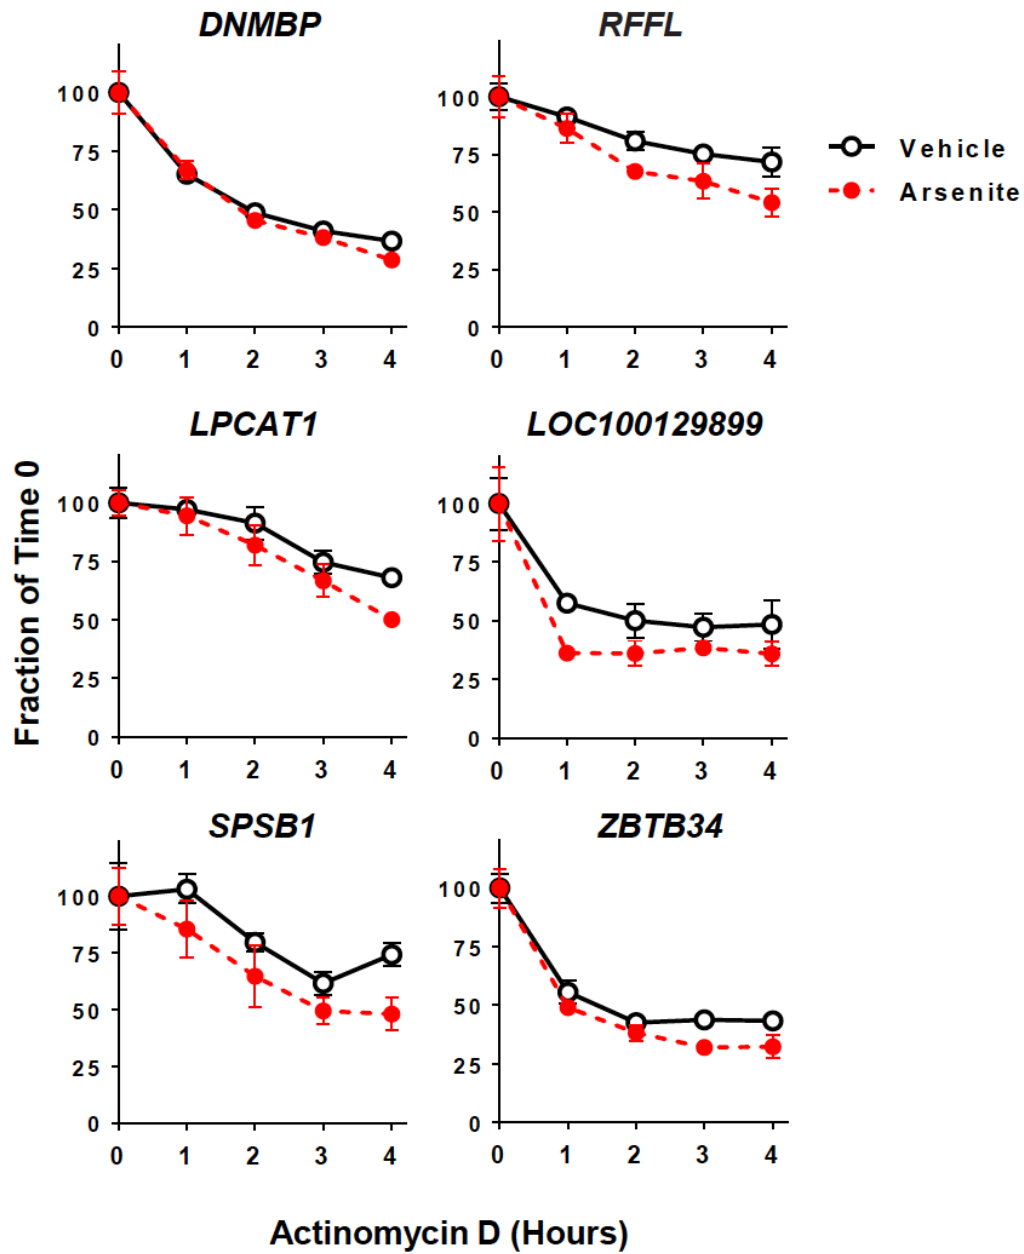

**Figure S3.** Decay rates of probe-set identified transcripts measured by microarray whose steady state levels after arsenite were not significantly different from control, but whose decay rates were significantly decreased by arsenite. Shown are the decay rates for six transcripts whose steady state levels were not significantly different in the control and arsenite-treated cells, but whose decay rates were significantly different by both the Oriegen and Edge methods ( $P < 0.05$ ).

The starting levels of each probe set-identified transcript after 24 h of treatment but before actinomycin D were set at 100%, and the other data are expressed as mean percentages  $\pm$  SD of that average starting value (n=4 biological replicates in each group). In these six examples, arsenite destabilized the mRNA. The Affymetrix probe set identifiers used for these transcripts were: DNMBP, 212838\_at; RFFL, 228980\_at; LPCAT1, 201818\_at; LOC100129899, 238771\_at; SPSB1, 219677\_at; and ZBTB34, 227111\_at. See the legend to Figure 1 for details.

**Table S1.** Primers used in the study.

| Gene    | GenBank Accession # | Amplicon length (bp) | Primer Sequences                                                                    |
|---------|---------------------|----------------------|-------------------------------------------------------------------------------------|
| ALAS1   | NM_000688.4         | 120                  | Forward: 5'-CAACCCTCTTCACCCTGGCTAA-3'<br>Reverse: 5'-GGCGGAAGATGTACTTTGGCA-3'       |
| ATP5C1  | NM_001001973.1      | 148                  | Forward: 5'-TTTGGAGATGCGTCAGTCATTG-3'<br>Reverse: 5'-CACTTGCAACGGTATTAAGGGAA-3'     |
| BACTIN  | NM_001101.3         | 137                  | Forward: 5'-AACTGGGACGACATGGAGAAA-3'<br>Reverse: 5'-ATGATCTGGGTCATCTTCTCGC-3'       |
| C3orf34 | NM_032898.3         | 92                   | Forward: 5'-AGAATAATCCGCGACACAAGAGTT-3'<br>Reverse: 5'-CCCCGACAAGTAACCTCGTAAA-3'    |
| CALU    | NM_001130674.2      | 152                  | Forward: 5'-TGACTTATGGCACTTACCTGGATGA-3'<br>Reverse: 5'-AGGGTGCAGGAAAGCTGTGAA-3'    |
| CALD1   | NM_033138.2         | 158                  | Forward: 5'-AGCAGGCACACCAAATAAGGAA-3'<br>Reverse: 5'-CCCAGAGGTTCCGCTTGCT-3'         |
| CTNNB1  | NM_001098209.1      | 153                  | Forward: 5'-TGACCAGCCGACACCAAGAA-3'<br>Reverse: 5'-CGGGACAAAGGGCAAGATTT-3'          |
| EIF5A   | NM_001143760.1      | 155                  | Forward: 5'-TCAGCCACCTTCCCAATGC-3'<br>Reverse: 5'-CCAGTAAAGATGTCAATACCAACCA-3'      |
| GATA3   | NM_001002295.1      | 95                   | Forward: 5'-CCTCATTAAGCCCAAGCGAA-3'<br>Reverse: 5'-TCCTCCTCCAGAGTGTGGTTGT-3'        |
| GAPDH   | NM_002046.3         | 105                  | Forward: 5'-CACCCACTCCTCCACCTTTGA-3'<br>Reverse: 5'-CTGTTGCTGTAGCCAAATTCGTT-3'      |
| GCNT4   | NM_016591.2         | 117                  | Forward: 5'-GAGCACTTTTGGGCTACCTTGA-3'<br>Reverse: 5'-ATAGTAATCCACTTGACAAGGCGA-3'    |
| GRPEL2  | NM_152407.3         | 142                  | Forward: 5'-GGAAGACGCCAAGATATTTGGAAT-3'<br>Reverse: 5'-TCGGAAGACCTTCTCCAGAGTGA -3'  |
| GSK3B   | NM_001146156.1      | 163                  | Forward: 5'-TCACTGTAACATAGTCCGATTGCGT-3'<br>Reverse: 5'-CTTGACATAAATCACAGGGAGCGT-3' |
| hLMO7   | NM_005358.5         | 108                  | Forward: 5'-TTCGGTGGTTTCTGATCTTCC-3'<br>Reverse: 5'-TCCTGCTCCTTCTGCCACCT-3'         |
| LRRFIP1 | NM_001137550.1      | 169                  | Forward: 5'-TGGATACCAAGGTCCTACCAAGAT-3'<br>Reverse: 5'-GCCAATCTTCTGTCTCTCCTCCA-3'   |
| MAP3K8  | NM_005204.2         | 127                  | Forward: 5'-AAGAGGCTGCTGAGTAGGAAGGA-3'<br>Reverse: 5'-GAGCGCCGAGGTCGATGTA-3'        |
| NAMPT   | NM_005746.2         | 131                  | Forward: 5'-CCAAGAGACTGCTGGCATAGGA-3'<br>Reverse: 5'-CTGGAACAGAATAGCCTGGAACA-3'     |
| NRG1    | NM_001159995.1      | 115                  | Forward: 5'-CTGTCACCCAGACTCCTAGCCA-3'<br>Reverse: 5'-GGGCTGCTGTGCCTACTGTTT-3'       |
| PARVA   | NM_018222.3         | 165                  | Forward: 5'-GGAATCCTCCAGTCTCGGCA-3'<br>Reverse: 5'-ATTCAGGTGCTTGTTCACGAAAGT-3'      |
| PEX13   | NM_002618.3         | 191                  | Forward: 5'-CTGAGAATGAAGACCTCTGGGCA -3'<br>Reverse: 5'-TGCCCAGTTGATGCTGTCTGTTAC-3'  |
| PHF8    | NM_015107.2         | 142                  | Forward: 5'-AGGCGACCCTGATAATAAGACCA-3'<br>Reverse: 5'-TCCACCATGTCCTCATCTGTTGTA-3'   |
| PPARA   | NM_001001928.2      | 138                  | Forward: 5'-CAAGAAATGGGAAACATCCAAGAG-3'<br>Reverse: 5'-TGGTCAAAGCGTGTCCGTGA-3'      |
| SLAIN2  | NM_020846.1         | 194                  | Forward: 5'-GCCATCCACAGATTTACAGACAA-3'<br>Reverse: 5'-GCCTGGAGAAGGTATGGCTGAA-3'     |
| STANNIN | NM_003498.4         | 124                  | Forward: 5'-CCCAGCACTGACCATGTCTATTAT-3'<br>Reverse: 5'-CCGAGGTAGCACCAGCA-3'         |
| ZCCHC6  | NM_024617.3         | 143                  | Forward: 5'-TGAGCAGGATGGAGACTTGGAA-3'<br>Reverse: 5'-TAGGGTAGTTTCGTGGTCGCC-3'       |
| ZFAND5  | NM_001102420.1      | 135                  | Forward: 5'-CTCAGCCCAGTCCATCAGTTTCT-3'<br>Reverse: 5'-ATCGGCAGTCAAACCCTGTAAGA-3'    |

**Table S2.** Top networks based on IPA analysis of up-regulated probe-set identified transcripts.

| <b>Rank</b> | <b>Associated Network Functions</b>                                                        | <b>Score</b> |
|-------------|--------------------------------------------------------------------------------------------|--------------|
| 1           | Small molecule biochemistry, carbohydrate metabolism, nucleic acid metabolism              | 57           |
| 2           | Organismal injury and abnormalities, renal and urological disease, cell death and survival | 40           |
| 3           | Small molecule biochemistry, cellular development, cellular growth and proliferation       | 40           |
| 4           | Lipid metabolism, small molecule biochemistry, cellular assembly and organization          | 26           |
| 5           | Cancer, cell death and survival, cellular development                                      | 21           |

**Table S3.** Top biological functions, canonical pathways, upstream regulators, and tox lists based on IPA analysis of up-regulated probe-set identified transcripts.

| Name                                                           | p-Value             | # Molecules | Ratio          | Predicted Activation State |
|----------------------------------------------------------------|---------------------|-------------|----------------|----------------------------|
| <b>Top biological functions</b>                                |                     |             |                |                            |
| Diseases and Disorders                                         |                     |             |                |                            |
| Cancer                                                         | 1.37E-11 - 7.52E-03 | 88          |                |                            |
| Gastrointestinal Disease                                       | 3.08E-11 - 7.52E-03 | 48          |                |                            |
| Hepatic System Disease                                         | 1.31E-06 - 3.30E-03 | 19          |                |                            |
| Organismal Injury and Abnormalities                            | 1.53E-06 - 7.52E-03 | 27          |                |                            |
| Renal and Urological Disease                                   | 4.64E-06 - 7.52E-03 | 21          |                |                            |
| Molecular and Cellular Functions                               |                     |             |                |                            |
| Cell Death and Survival                                        | 9.38E-09 - 7.52E-03 | 64          |                |                            |
| Carbohydrate Metabolism                                        | 3.74E-07 - 7.52E-03 | 23          |                |                            |
| Nucleic Acid Metabolism                                        | 3.74E-07 - 7.52E-03 | 15          |                |                            |
| Small Molecule Biochemistry                                    | 2.07E-06 - 7.52E-03 | 41          |                |                            |
| Cell Morphology                                                | 5.62E-05 - 7.52E-03 | 14          |                |                            |
| Physiological System Development and Function                  |                     |             |                |                            |
| Organ Morphology                                               | 1.09E-05 - 7.52E-03 | 19          |                |                            |
| Renal and Urological System Development and Function           | 1.09E-05 - 7.52E-03 | 12          |                |                            |
| Cardiovascular System Development and Function                 | 5.62E-05 - 7.52E-03 | 15          |                |                            |
| Embryonic Development                                          | 5.62E-05 - 7.52E-03 | 13          |                |                            |
| Hepatic System Development and Function                        | 5.62E-05 - 5.85E-03 | 6           |                |                            |
| <b>Top Canonical Pathways</b>                                  |                     |             |                |                            |
| NRF2-mediated Oxidative Stress Response                        | 8.1E-11             |             | 14/192 (0.073) |                            |
| Pentose Phosphate Pathway                                      | 9.69E-07            |             | 4/23 (0.174)   |                            |
| Vitamin-C Transport                                            | 1.43E-04            |             | 3/22 (0.136)   |                            |
| Methylglyoxal Degradation III                                  | 2.17E-04            |             | 3/23 (0.13)    |                            |
| Heme Degradation                                               | 3.34E-04            |             | 2/11 (0.182)   |                            |
| <b>Top Upstream Regulators</b>                                 |                     |             |                |                            |
| NFE2L2                                                         | 8.40E-25            |             |                | Activated                  |
| tert-butyl-hydroquinone                                        | 3.06E-18            |             |                | Activated                  |
| arsenic trioxide                                               | 2.11E-17            |             |                | Activated                  |
| 2-cyano-3 12-dioxoolean-1 9-dien-28-oic acid                   | 3.18E-17            |             |                | Activated                  |
| BACH1                                                          | 3.97E-15            |             |                | Inhibited                  |
| <b>Top Tox Lists</b>                                           |                     |             |                |                            |
| NRF2-mediated Oxidative Stress Response                        | 2.56E-09            |             | 14/234 (0.06)  |                            |
| Protection from Hypoxia-induced Renal Ischemic Injury (Rat)    | 1.65E-06            |             | 3/4 (0.75)     |                            |
| Long-term Renal Injury Anti-oxidative Response Panel (Rat)     | 8.62E-06            |             | 4/18 (0.222)   |                            |
| Glutathione Depletion - CYP Induction and Reactive Metabolites | 8.71E-05            |             | 3/12 (0.25)    |                            |



**Table S4.** IPA analysis of down-regulated probe-set identified transcripts.

| <b>Rank</b> | <b>Associated Network Functions</b>                                                                               | <b>Score</b> |
|-------------|-------------------------------------------------------------------------------------------------------------------|--------------|
| 1           | Cell death and survival, embryonic development, cellular growth and proliferation                                 | 48           |
| 2           | Nervous system development and function, organ morphology, antigen presentation                                   | 30           |
| 3           | Cardiovascular disease, cardiovascular system development and function, lymphoid tissue structure and development | 28           |
| 4           | Cancer, developmental disorder, hereditary disorder                                                               | 27           |
| 5           | Cell death and survival, cellular assembly and organization, cellular compromise                                  | 24           |

**Table S5.** IPA analysis of down-regulated probe-set identified transcripts.

| Name                                                 | p-Value             | # Molecules   | Ratio          | Predicted Activation State |
|------------------------------------------------------|---------------------|---------------|----------------|----------------------------|
| <b>Diseases and Disorders</b>                        |                     |               |                |                            |
| Cancer                                               | 1.81E-09 - 6.30E-03 | 83            |                |                            |
| Gastrointestinal Disease                             | 1.95E-09 - 6.30E-03 | 44            |                |                            |
| Reproductive System Disease                          | 7.27E-08 - 6.30E-03 | 41            |                |                            |
| Developmental Disorder                               | 2.63E-06 - 6.30E-03 | 27            |                |                            |
| Skeletal and Muscular Disorders                      | 3.45E-06 - 6.30E-03 | 21            |                |                            |
| <b>Molecular and Cellular Functions</b>              |                     |               |                |                            |
| Cellular Growth and Proliferation                    | 4.73E-09 - 6.30E-03 | 59            |                |                            |
| Cellular Development                                 | 3.20E-07 - 6.30E-03 | 51            |                |                            |
| Cell Death and Survival                              | 2.35E-06 - 6.30E-03 | 47            |                |                            |
| Cellular Movement                                    | 3.94E-06 - 6.30E-03 | 37            |                |                            |
| Cell Morphology                                      | 1.17E-04 - 6.30E-03 | 36            |                |                            |
| <b>Physiological System Development and Function</b> |                     |               |                |                            |
| Cardiovascular System Development and Function       | 8.42E-08 - 6.30E-03 | 32            |                |                            |
| Lymphoid Tissue Structure and Development            | 8.42E-08 - 6.30E-03 | 14            |                |                            |
| Embryonic Development                                | 1.43E-05 - 6.30E-03 | 40            |                |                            |
| Organ Development                                    | 1.43E-05 - 6.30E-03 | 36            |                |                            |
| Organismal Development                               | 1.43E-05 - 6.30E-03 | 49            |                |                            |
| <b>Top Canonical Pathways</b>                        |                     |               |                |                            |
| cAMP-mediated signaling                              | 4.85E-04            | 7/226 (0.031) | 7/226 (0.031)  |                            |
| G-Protein Coupled Receptor Signaling                 | 1.23E-03            | 7/275 (0.025) | 7/275 (0.025)  |                            |
| Interferon Signaling                                 | 1.26E-03            | 3/36 (0.083)  | 3/36 (0.083)   |                            |
| Cellular Effects of Sildenafil (Viagra)              | 8.98E-03            | 4/149 (0.027) | 4/149 (0.027)  |                            |
| Hepatic Fibrosis / Hepatic Stellate Cell Activation  | 1.16E-02            | 4/146 (0.027) | 4/146 (0.027)  |                            |
| <b>Top Upstream Regulators</b>                       |                     |               |                |                            |
| TNF                                                  | 1.18E-10            |               |                | Inhibited                  |
| Cg                                                   | 3.60E-10            |               |                | Inhibited                  |
| TGFB1                                                | 7.74E-09            |               |                | Inhibited                  |
| Tretinoin                                            | 5.29E-08            |               |                | Inhibited                  |
| beta-estradiol                                       | 1.02E-07            |               |                | Inhibited                  |
| <b>Top Tox Lists</b>                                 |                     |               |                |                            |
| Cardiac Hypertrophy                                  | 6.29E-05            |               | 10/344 (0.029) |                            |
| Increases Heart Failure                              | 1.85E-04            |               | 3/18 (0.167)   |                            |
| Renal Necrosis/Cell Death                            | 6.61E-04            |               | 10/461 (0.022) |                            |
| Reversible Glomerulonephritis Biomarker Panel (Rat)  | 1.25E-02            |               | 2/27 (0.074)   |                            |
| Persistent Renal Ischemia-Reperfusion Injury (Mouse) | 1.52E-02            |               | 2/30 (0.067)   |                            |

**Table S6.** Transcripts with changes in decay rates but not steady state levels in response to arsenite.

| Affy number  | Gene                | Protein                                                               | RefSeq mRNA  | ORIOGEN<br>p-Value | Edge<br>p-Value | Arsenite<br>effect* | Control 4h avg<br>(%) | Arsenite 4h avg<br>(%) |
|--------------|---------------------|-----------------------------------------------------------------------|--------------|--------------------|-----------------|---------------------|-----------------------|------------------------|
| 1555436_a_at | <i>AFF4</i>         | AF4/FMR2 family, member 4                                             | NM_014423    | 0.0008             | 0.0023          | s                   | 72.6                  | 96.8                   |
| 226095_s_at  | <i>ATXN1L</i>       | ataxin 1-like                                                         | NM_001137675 | 0.0066             | 0.0020          | d                   | 61.8                  | 54.7                   |
| 215199_at    | <i>CALD1</i>        | caldesmon 1                                                           | NM_004342    | 0.0001             | 0.000003        | s                   | 30.2                  | 64.5                   |
| 1565868_at   | <i>CD44</i>         | CD44 molecule (Indian blood group)                                    | NM_000610    | 0.0047             | 0.0029          | s                   | 53.9                  | 73.3                   |
| 233109_at    | <i>COL12A1</i>      | Collagen, type XII, alpha 1                                           | NM_004370    | 0.0001             | 0.0004          | s                   | 27.5                  | 46.1                   |
| 220694_at    | <i>DDEF1IT1</i>     | DDEF1 intronic transcript 1 (non-protein coding)                      | NR_002765    | 0.0016             | 0.0001          | s                   | 59.1                  | 98.3                   |
| 1570415_at   | <i>DDX52</i>        | DEAD (Asp-Glu-Ala-Asp) box polypeptide 52                             | NM_007010    | 0.0022             | 0.0005          | s                   | 61.2                  | 88.4                   |
| 223662_x_at  | <i>DDX59</i>        | DEAD (Asp-Glu-Ala-Asp) box polypeptide 59                             | NM_001031725 | 0.0010             | 0.0031          | s                   | 65.1                  | 73.8                   |
| 212838_at    | <i>DNMBP</i>        | dynamamin binding protein                                             | NM_015221    | 0.0001             | 0.00007         | d                   | 36.7                  | 28.5                   |
| 236649_at    | <i>DTWD1</i>        | DTW domain containing 1                                               | NM_001144955 | 0.0009             | 0.0094          | s                   | 31.3                  | 41.8                   |
| 201693_s_at  | <i>EGR1</i>         | early growth response 1                                               | NM_001964    | 0.0057             | 0.0089          | s                   | 46.9                  | 65.2                   |
| 231292_at    | <i>EID3</i>         | EP300 interacting inhibitor of differentiation 3                      | NM_001008394 | 0.0002             | 0.00004         | s                   | 38.3                  | 53.5                   |
| 236700_at    | <i>EIF3C</i>        | eukaryotic translation initiation factor 3, subunit C                 | NM_001037808 | 0.0001             | 0.0007          | s                   | 45.1                  | 71.8                   |
| 1556732_at   | <i>EML4</i>         | Echinoderm microtubule associated protein like 4                      | NM_001145076 | 0.0088             | 0.0060          | s                   | 59.6                  | 80.6                   |
| 1564796_at   | <i>EMP1</i>         | epithelial membrane protein 1                                         | NM_001423    | 0.0001             | 0.0028          | s                   | 69.8                  | 101.2                  |
| 209004_s_at  | <i>FBXL5</i>        | F-box and leucine-rich repeat protein 5                               | NM_012161    | 0.0008             | 0.000001        | s                   | 29.3                  | 49.8                   |
| 209189_at    | <i>FOS</i>          | v-fos FBJ murine osteosarcoma viral oncogene homolog                  | NM_005252    | 0.0004             | 0.0020          | s                   | 49.6                  | 66.4                   |
| 220938_s_at  | <i>GMEB1</i>        | glucocorticoid modulatory element binding protein 1                   | NM_006582    | 0.0008             | 0.0024          | s                   | 74.7                  | 95.7                   |
| 233599_at    | <i>hCG_2003663</i>  | hCG2003663                                                            | XR_040680    | 0.0040             | 0.0092          | s                   | 49.7                  | 74.7                   |
| 215268_at    | <i>KIAA0754</i>     | hypothetical LOC643314                                                | NM_015038    | 0.0006             | 0.0068          | s                   | 54.9                  | 80.5                   |
| 227317_at    | <i>LMCD1</i>        | LIM and cysteine-rich domains 1                                       | NM_014583    | 0.0033             | 0.0063          | s                   | 74.4                  | 108.2                  |
| 241140_at    | <i>LMO7</i>         | LIM domain 7                                                          | NM_005358    | 0.0001             | 0.0006          | s                   | 39.6                  | 62.6                   |
| 238771_at    | <i>LOC100129899</i> | hypothetical protein LOC100129899                                     | XM_001714827 | 0.0029             | 0.0099          | d                   | 48.4                  | 35.9                   |
| 213089_at    | <i>LOC100272216</i> | hypothetical LOC100272216                                             | NR_027439    | 0.0012             | 0.0067          | s                   | 57.7                  | 87.3                   |
| 1557987_at   | <i>LOC641298</i>    | SMG1 homolog, phosphatidylinositol 3-kinase-related kinase pseudogene | NR_027154    | 0.0003             | 0.0049          | s                   | 71.2                  | 95.8                   |
| 231987_at    | <i>LOC728264</i>    | hypothetical LOC728264                                                | NR_027180    | 0.0001             | 0.0060          | s                   | 52.7                  | 73.5                   |
| 201818_at    | <i>LPCAT1</i>       | lysophosphatidylcholine acyltransferase 1                             | NM_024830    | 0.0072             | 0.0003          | d                   | 68.0                  | 50.0                   |
| 215375_x_at  | <i>LRRFIP1</i>      | Leucine rich repeat (in FLII) interacting protein 1                   | NM_001137550 | 0.0001             | 0.0078          | s                   | 55.2                  | 70.8                   |
| 221650_s_at  | <i>MED18</i>        | mediator complex subunit 18                                           | NM_001127350 | 0.0004             | 0.0092          | s                   | 43.6                  | 60.1                   |
| 239316_at    | <i>METTL12</i>      | methyltransferase like 12                                             | NM_001043229 | 0.0003             | 0.0049          | s                   | 64.0                  | 80.2                   |

| Affy number  | Gene           | Protein                                                  | RefSeq mRNA  | ORIOGEN p-Value | Edge p-Value | Arsenite effect* | Control 4h avg (%) | Arsenite 4h avg (%) |
|--------------|----------------|----------------------------------------------------------|--------------|-----------------|--------------|------------------|--------------------|---------------------|
| 229437_at    | <i>MIRHG2</i>  | microRNA host gene 2 (non-protein coding)                | NR_001458    | 0.0028          | 0.0039       | s                | 38.0               | 58.0                |
| 217909_s_at  | <i>MLX</i>     | MAX-like protein X                                       | NM_170607    | 0.0002          | 0.0016       | s                | 67.4               | 79.6                |
| 243296_at    | <i>NAMPT</i>   | Nicotinamide phosphoribosyltransferase                   | NM_005746    | 0.0001          | 0.0011       | s                | 36.5               | 50.1                |
| 242918_at    | <i>NASP</i>    | Nuclear autoantigenic sperm protein (histone-binding)    | NM_002482    | 0.0001          | 0.0050       | s                | 61.9               | 78.2                |
| 233870_at    | <i>NAV1</i>    | neuron navigator 1                                       | NM_020443    | 0.0001          | 0.0001       | s                | 60.6               | 81.4                |
| 1556277_a_at | <i>PAPD4</i>   | PAP associated domain containing 4                       | NM_001114393 | 0.0014          | 0.0013       | s                | 71.3               | 96.8                |
| 215418_at    | <i>PARVA</i>   | parvin, alpha                                            | NM_018222    | 0.0001          | 0.00001      | s                | 41.7               | 69.9                |
| 1552670_a_at | <i>PPP1R3B</i> | protein phosphatase 1, regulatory (inhibitor) subunit 3B | NM_024607    | 0.0001          | 0.0009       | s                | 55.8               | 85.1                |
| 204897_at    | <i>PTGER4</i>  | prostaglandin E receptor 4 (subtype EP4)                 | NM_000958    | 0.0022          | 0.0088       | s                | 51.2               | 61.0                |
| 230742_at    | <i>RBM6</i>    | RNA binding motif protein 6                              | NM_005777    | 0.0001          | 0.0008       | s                | 29.4               | 43.7                |
| 228980_at    | <i>RFFL</i>    | ring finger and FYVE-like domain containing 1            | NM_001017368 | 0.0063          | 0.0033       | d                | 71.7               | 54.0                |
| 204899_s_at  | <i>SAP30</i>   | Sin3A-associated protein, 30kDa                          | NM_003864    | 0.0050          | 0.0014       | s                | 74.4               | 93.3                |
| 215209_at    | <i>SEC24D</i>  | SEC24 family, member D ( <i>S. cerevisiae</i> )          | NM_014822    | 0.0001          | 0.0098       | s                | 30.8               | 53.4                |
| 219677_at    | <i>SPSB1</i>   | splA/ryanodine receptor domain and SOCS box containing 1 | NM_025106    | 0.0042          | 0.0064       | d                | 74.3               | 48.1                |
| 235925_at    | <i>TCF12</i>   | Transcription factor 12                                  | NM_003205    | 0.0001          | 0.0069       | s                | 42.4               | 59.7                |
| 211296_x_at  | <i>UBC</i>     | ubiquitin C                                              | NM_021009    | 0.0076          | 0.0002       | s                | 64.5               | 75.1                |
| 227111_at    | <i>ZBTB34</i>  | zinc finger and BTB domain containing 34                 | NM_001099270 | 0.0022          | 0.0022       | d                | 43.3               | 32.3                |
| 217649_at    | <i>ZFAND5</i>  | zinc finger, AN1-type domain 5                           | NM_001102420 | 0.0001          | 0.00003      | s                | 44.8               | 65.1                |
| 234300_s_at  | <i>ZFP28</i>   | zinc finger protein 28 homolog (mouse)                   | NM_020828    | 0.0002          | 0.0046       | d                | 56.2               | 52.6                |

\*s, stabilized; d, destabilized.
